# Supplementary material for: Stimulative formation of truncated octahedral LiMn2O4 by Cr and Al co-doping for use in durable cycling Li-ion batteries
Source: Royal Society of Chemistry journal article supplement (doi:10.1039/d1dt03221f), 2021-01-01
Supplement: d1dt03221f1.pdf [file d1dt03221f1.pdf]

## Electronic supplementary information

### Stimulative formation of truncated octahedral $\text{LiMn}_2\text{O}_4$ by Cr and Al co-doping for durable cycling Li-ion batteries

Qimei Liang,<sup>a,b</sup> Zilin Wang,<sup>a,b</sup> Wei Bai,<sup>a,b</sup> Junming Guo,<sup>\* a,b</sup> Mingwu Xiang,<sup>\* a,b</sup> Xiaofang Liu,<sup>a,b</sup> Hongli Bai<sup>a,b</sup>

<sup>a</sup> National and Local Joint Engineering Research Center for Green Preparation Technology of Biobased Materials, Yunnan Minzu University, Kunming, 650500, China

<sup>b</sup> Key Laboratory of Green-chemistry Materials in University of Yunnan Province, Yunnan Minzu University, Kunming, 650500, China

### The calculation of Li<sup>+</sup> diffusion coefficient( $D_{Li^+}$ ):

The corresponding formula is as follows:<sup>1</sup>

$$Z'=R_s+R_{ct}+\delta_w\omega^{-0.5} \quad (1)$$

Further, the  $D_{Li^+}$  can be calculated by the following formula:

$$D_{Li^+}=R^2T^2/2S^2n^4F^4C^2\delta_w^2 \quad (2)$$

where the constant values of R and F are 8.314 J/K·mol and 96484.5 C/mol, respectively; the absolute temperature T is 298.15 K; S is the surface area of electrode which is 6.15(cm<sup>2</sup>); the electron transfer number n is 1; C is the volume concentration of Li<sup>+</sup> in the spinel LiMn<sub>2</sub>O<sub>4</sub> 0.02378 mol/cm<sup>3</sup>;  $\delta_w$  is the slope of the line of  $Z'\sim\omega^{-0.5}$ (Figure. S10).

### The calculation of the apparent activation energy( $E_a$ ):

The following formula is generally used to calculate the activation energy ( $E_a$ ) depend on the EIS data at different temperatures:<sup>2</sup>

$$i_0=RT/nFR_{ct} \quad (3)$$

$$i_0=A\exp(-E_a/RT) \quad (4)$$

where  $i_0$  means exchange current, the constant values of R and F are 8.314 J/K·mol and 96484.5 C/mol, respectively; the absolute temperature T is 298.15 K; A is an in-dependent coefficient of temperature; the insets in Figure. S11a and b show the Arrhenius plots of  $\log i_0$  as a function of 1/T. Based on Eq. (3) and (4),  $E_a$  can be expressed in the equation of  $E_a=-Rk\ln 10$ (k is the slope of the fitting line in the insets of Figure. S11a and b), thus the activation energies can be further calculated.

## References

- 1 Y. Liu, Z. Yang, J. Li, B. Niu, K. Yang and F. Kang, *J. Mater. Chem. A*, 2018, **6**, 13883-13893.
- 2 S. L. Chou, J. Z. Wang, J. Z. Sun, D. Wexler, M. Forsyth, H. K. Liu, D. R. MacFarlane, S. X. Dou, *Chem. Mater.*, 2008, **20**, 7044-7051.

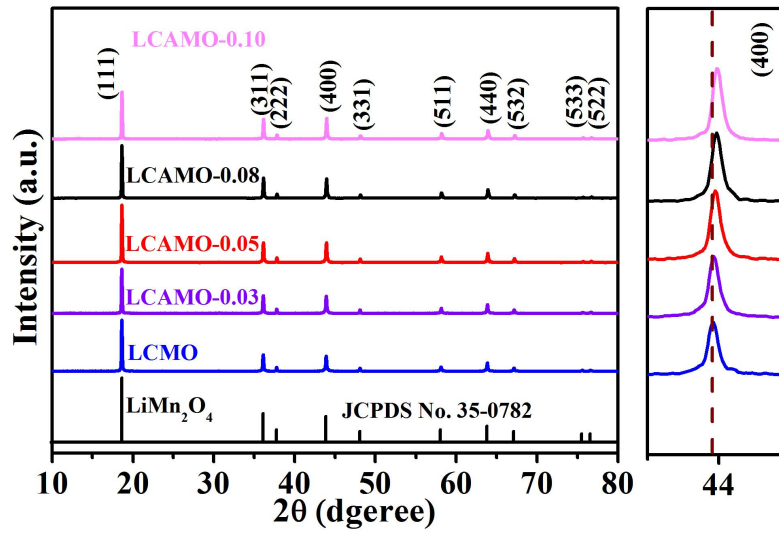

Fig. S1 XRD patterns of all samples along with locally enlarged (400) peaks.

Table. S1 Lattice parameters comparison of all samples

| sample     | lattice constants (Å) | cell volume(Å <sup>3</sup> ) | FWHM of (400) peak(°) |
|------------|-----------------------|------------------------------|-----------------------|
| LCMO       | 8.23954               | 559.38                       | 0.210                 |
| LCAMO-0.03 | 8.23700               | 558.86                       | 0.206                 |
| LCAMO-0.05 | 8.23353               | 558.16                       | 0.199                 |
| LCAMO-0.08 | 8.23057               | 557.56                       | 0.197                 |
| LCAMO-0.10 | 8.22886               | 557.21                       | 0.187                 |

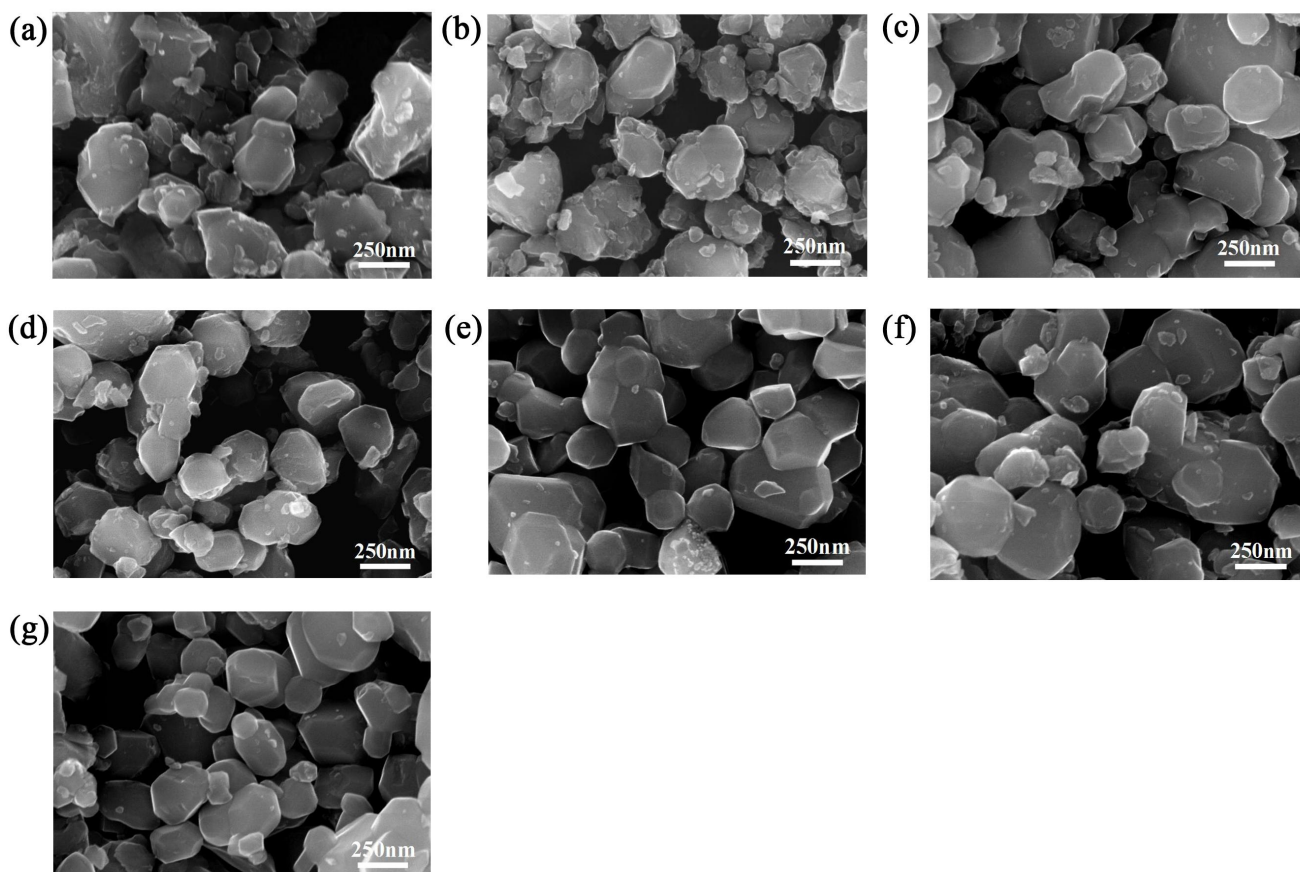

**Fig. S2** SEM images of LMO (a), LCMO (b), LAMO (c), LCAMO-0.03 (d), LCAMO-0.05 (e), LCAMO-0.08 (f) and LCAMO-0.10 (g).

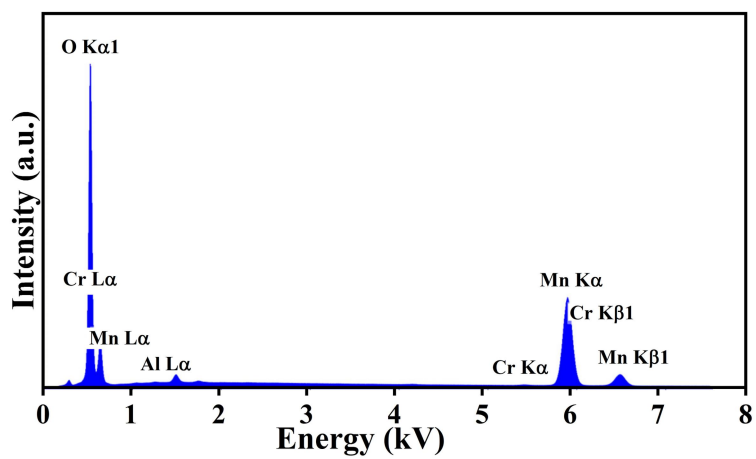

**Fig. S3** EDS spectrum of the LCAMO-0.05.

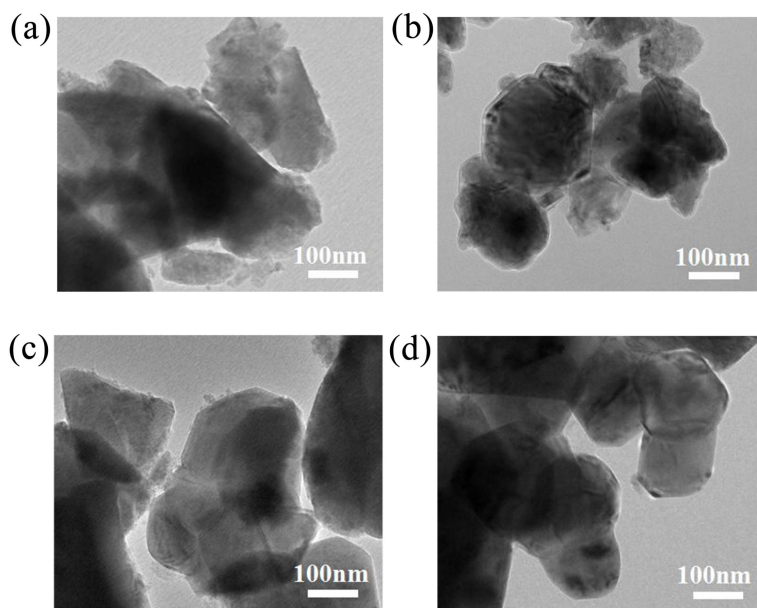

**Fig. S4** TEM images of LMO (a), LCMO (b), LAMO (c) and LCAMO-0.05.

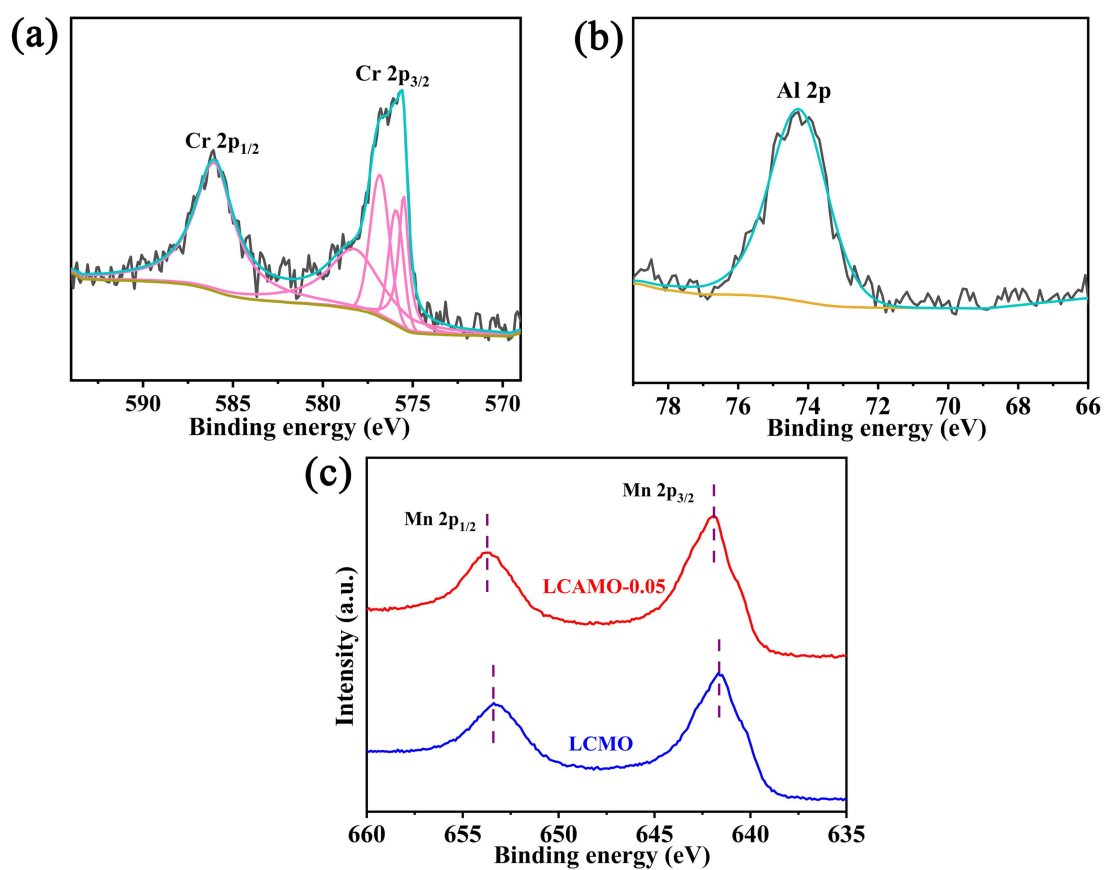

**Fig. S5** The high resolution XPS spectra of (a) Cr2p and (b) Al2p of LCAMO-0.05, (c) Mn2p spectra of LCMO and LCAMO-0.05.

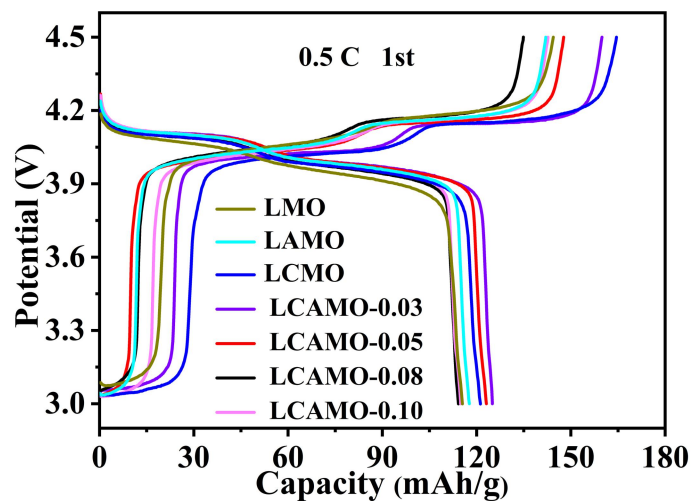

Fig. S6 Initial charge/discharge profiles of all samples at 0.5 C.

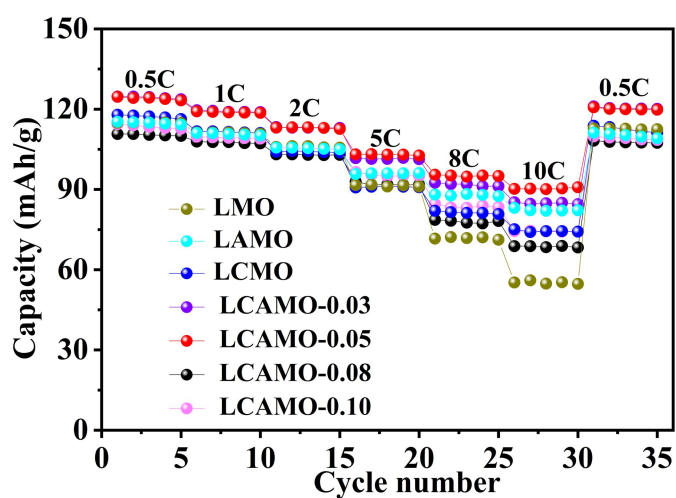

Fig. S7 Rate performances of all samples ranging from 0.5 to 10 C.

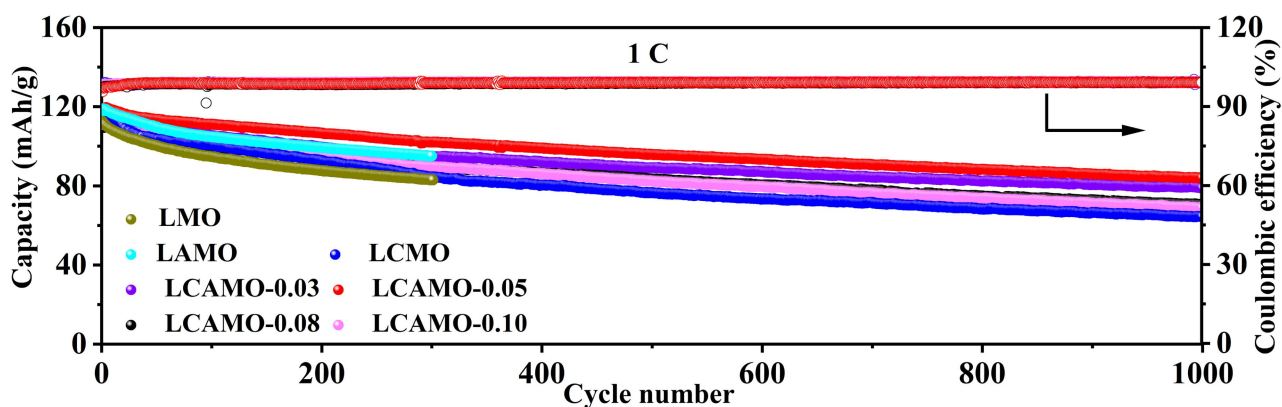

Fig. S8 Cycle performances of all samples at 1 C.

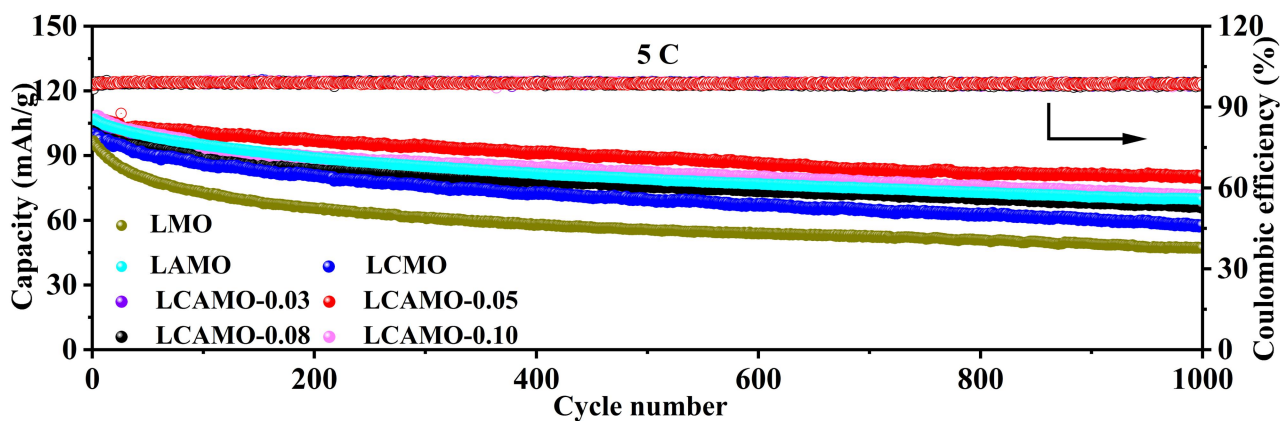

Fig. S9 Cycle performances of all samples at 5 C.

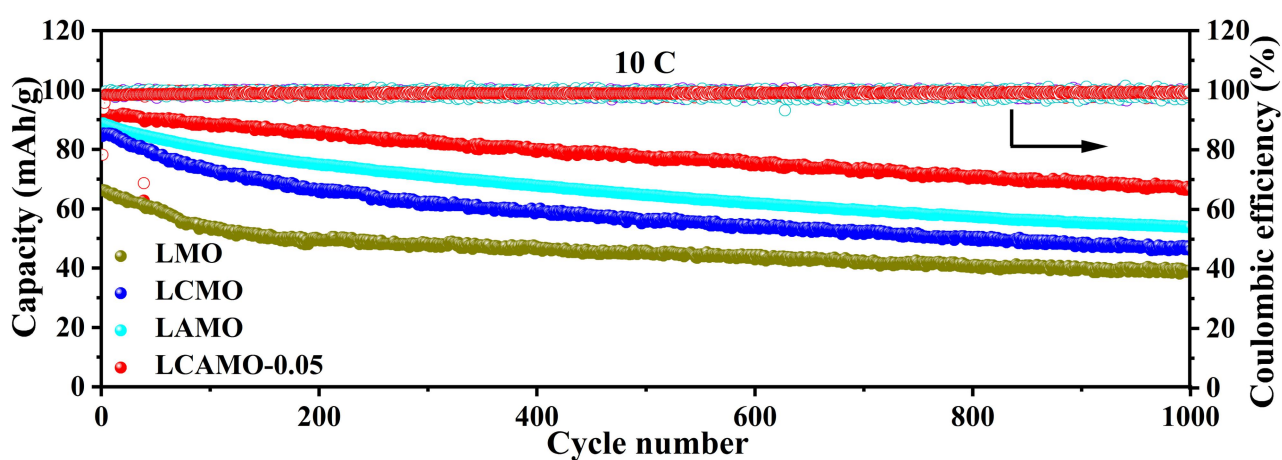

Fig. S10 Cycle performances of LMO, LCMO, LAMO and LCAMO-0.05 at 10 C.

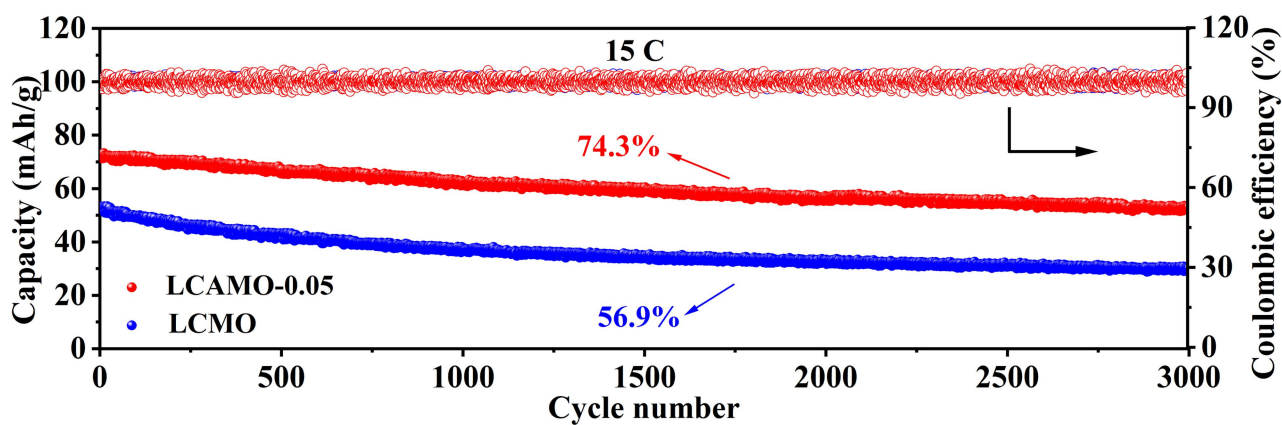

Fig. S11 Cycling performances of LCMO and LCAMO-0.05 at high rate of 15 C.

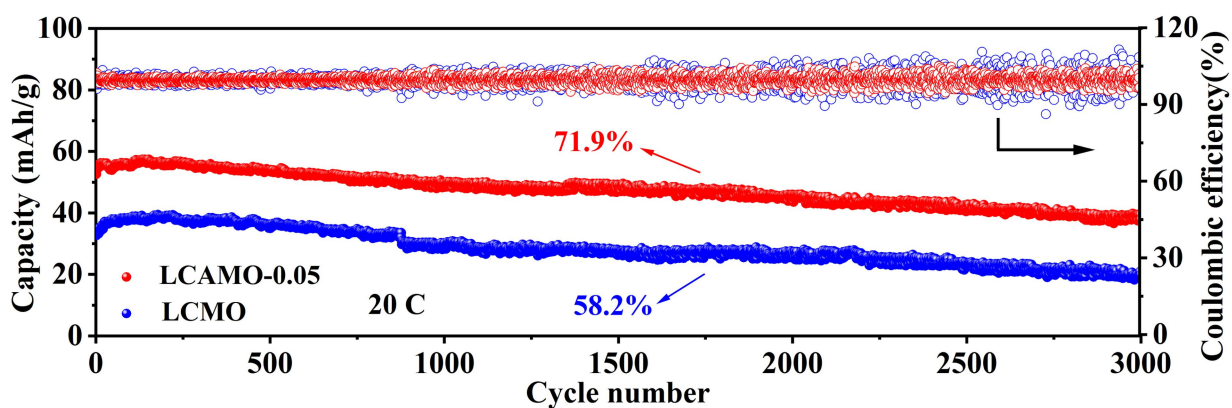

Fig. S12 Cycling performances of LCMO and LCAMO-0.05 at high rate of 20 C.

Table. S2 The charge transfer resistance( $R_{ct}$ ), electrolyte resistance( $R_s$ ) and  $\Delta R_{ct}$  [ $R_{ct}(\text{before cycle}) - R_{ct}(\text{after cycles})$ ] values of LCMO and LCAMO-0.05 based on the EIS data before and after 1000 cycles at 5 C

| sample     | $R_s/\Omega$ | $R_{ct}/\Omega$ | $\Delta R_{ct}/\Omega$ |
|------------|--------------|-----------------|------------------------|
| LCMO       | before cycle | 1.82            | 170.6                  |
|            | after cycles | 3.78            | 340.0                  |
| LCAMO-0.05 | before cycle | 1.50            | 151.3                  |
|            | after cycles | 3.73            | 222.0                  |

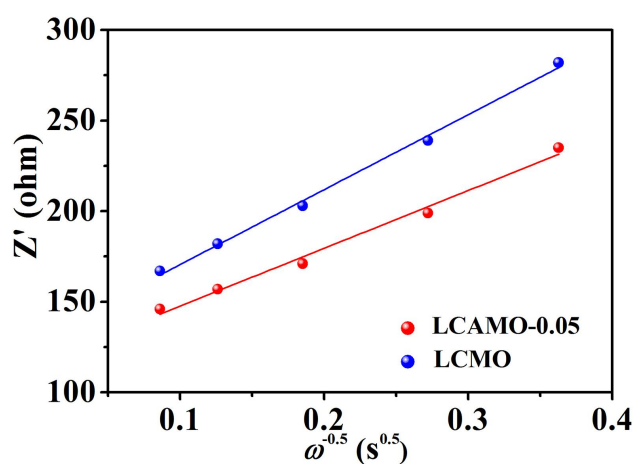

Fig. S13 Fitting curves of the real parts of complex impedance  $Z'$  and the  $\omega^{-0.5}$



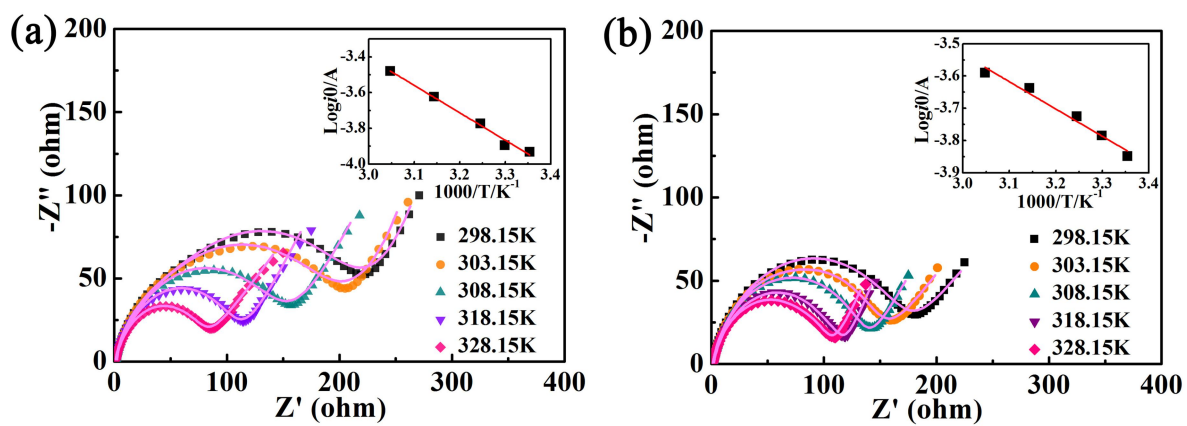

**Fig. S14** EIS spectra at different temperatures(25-55 °C) of LCMO (a) and LCAMO-0.05 (b), the insets are the corresponding Arrhenius plots of  $\log i_0$  vs.  $1000/T$ .
